# Supplementary material for: Immunometabolic Profile Associated with Progressive Damage of the Intestinal Mucosa in Adults Screened for Colorectal Cancer: Association with Diet
Source: MDPI journal article supplement (doi:10.3390/ijms242216451), 2023-11-17
Supplement: s1 [file s1]

# Supplementary Materials

**Table S1.** Differences in inflammation parameters according to clinical diagnosis groups.

| Parameter                       | Control                   | Polyyps                     | CRC                        |
|---------------------------------|---------------------------|-----------------------------|----------------------------|
| Antioxidant capacity (mM)       | 0.27 ± 0.04 (22)          | 0.29 ± 0.06 (29)            | 0.29 ± 0.05 (6)            |
| Total cholesterol (mg/dL)       | 255.74 ± 40.79 (20)       | 243.43 ± 72.23 (27)         | 283.00 ± 87.98 (5)         |
| <i>Cytokines and chemokines</i> |                           |                             |                            |
| IL-17 (pg/mL)                   | 13.89 ± 13.14 (23)        | 17.13 ± 25.55 (33)          | 21.37 ± 29.32 (6)          |
| IL-6 (pg/mL)                    | 22.40 ± 4.90 (23)         | 27.08 ± 15.85 (33)          | 30.14 ± 23.11 (6)          |
| IL-10 (pg/mL)                   | 86.67 ± 24.59 (23)        | 87.12 ± 20.25 (33)          | 94.61 ± 37.39 (6)          |
| IL-12 (pg/mL)                   | 42.41 ± 6.43 (23)         | 44.32 ± 11.80 (33)          | 53.18 ± 17.82 (6)          |
| IL-4 (pg/mL)                    | 5.08 ± 2.20 (23)          | 7.42 ± 9.42 (33)            | 5.39 ± 2.16 (6)            |
| IFN-γ (pg/mL)                   | 12.91 ± 18.64 (23)        | 8.40 ± 6.67 (33)            | 15.45 ± 14.27 (6)          |
| TGF-β (pg/mL)                   | 105.84 ± 29.52 (23)       | 113.86 ± 40.17 (33)         | 120.23 ± 41.29 (6)         |
| IL-2 (pg/mL)                    | 7.61 ± 7.28 (23)          | 8.00 ± 7.47 (33)            | 6.28 ± 1.47 (6)            |
| CXCL10 (pg/mL)                  | 46.15 ± 13.84 (23)        | 54.20 ± 28.47 (33)          | 112.82 ± 146.79 * (6)      |
| IL-1β (pg/mL)                   | 30.03 ± 5.40 (23)         | 39.17 ± 25.47 (33)          | 36.29 ± 12.96 (6)          |
| TNF-α (pg/mL)                   | 64.63 ± 28.33 (23)        | 73.33 ± 53.34 (32)          | 71.06 ± 19.16 (6)          |
| CCL2 (pg/mL)                    | 69.74 ± 49.54 (23)        | 81.91 ± 90.37 (33)          | 67.09 ± 17.16 (6)          |
| <i>Adipokines</i>               |                           |                             |                            |
| Adiponectin (ng/mL)             | 204376.99 ± 76815.36 (23) | 159034.48 ± 63473.78 * (32) | 133043.19 ± 36979.07 * (6) |
| Adipsin (ng/mL)                 | 2384.29 ± 337.36 (23)     | 2202.65 ± 400.04 (32)       | 2194.81 ± 278.95 (6)       |
| Leptin (pg/mL)                  | 18.91 ± 3.79 (23)         | 19.97 ± 7.30 (33)           | 26.02 ± 12.82 (6)          |
| Resistin (ng/mL)                | 25.93 ± 20.78 (23)        | 25.01 ± 19.6 (33)           | 9.38 ± 7.46 * (6)          |

Values are shown as mean ± standard deviation (SD) and number of volunteers with available information in parentheses. (\*) Statistically significant differences compared to control group ( $p < 0.05$ ). (†) Statistically significant differences compared to polyyps group ( $p < 0.05$ ). Differences were analyzed by non-parametric tests. CRC, colorectal cancer; IL, interleukin; IFN-γ, interferon-gamma; TGF-β, transforming growth factor-beta; CXCL10, C-X-C motif chemokine ligand 10; TNF-α, tumour necrosis factor-alpha; CCL2, chemokine (C-C motif) ligand 2.

**Table S2.** Food groups consumption according to clinical diagnosis groups.

| Food group (g/day)           | Control (n = 37) | Polyyps (n = 49)  | CRC (n = 3)      |
|------------------------------|------------------|-------------------|------------------|
| Oils and fats                | 22.81 ± 11.2     | 26.54 ± 21.52     | 25.41 ± 13.16    |
| Cereals and cereals products | 183.86 ± 124.31  | 183.69 ± 93.36    | 176.76 ± 95      |
| Whole grain cereals          | 26.82 ± 67.53    | 9.78 ± 26.85      | 18.21 ± 44.97    |
| Milk and dairy products      | 338.15 ± 227.7   | 372.08 ± 230.56   | 449.65 ± 122.45  |
| Meat and meat products       | 170.06 ± 101.78  | 193.44 ± 132.03   | 172.72 ± 83.1    |
| Eggs                         | 40.54 ± 26.87    | 46.57 ± 25.18     | 38.16 ± 24.85    |
| Fish                         | 60.54 ± 43.62    | 55.53 ± 31.89     | 69.23 ± 51.88    |
| Seafood                      | 17.41 ± 18.23    | 17.39 ± 16.79     | 18.41 ± 17.91    |
| Vegetables                   | 262.07 ± 156.87  | 253.46 ± 164.55   | 245.91 ± 156.56  |
| Legumes                      | 35 ± 39.43       | 32.09 ± 28.59     | 35.03 ± 38.57    |
| Potatoes and tubers          | 64.01 ± 54.73    | 67.2 ± 45.71      | 80.08 ± 60.78    |
| Fruits                       | 152.17 ± 117.17  | 137.87 ± 146.59   | 154.98 ± 41.64   |
| Nuts and seeds               | 11.81 ± 13.51    | 9.56 ± 11.13      | 11.67 ± 12.58    |
| Sugar and sweets             | 17.07 ± 20.82    | 15.97 ± 16.22     | 16.25 ± 14.06    |
| Sauces and condiments        | 10.13 ± 7.44     | 11.59 ± 10.79     | 8.28 ± 2.34      |
| Other foods                  | 22.11 ± 46.74    | 21.17 ± 44.72     | 24.86 ± 42.7     |
| Non-alcoholic beverages      | 1669.98 ± 493.18 | 1755.13 ± 807.48  | 1947.74 ± 584.16 |
| Alcoholic beverages          | 159.2 ± 263.48   | 375.03 ± 593.13 * | 206.18 ± 252.17  |
| Red meat                     | 62.33 ± 56.19    | 73.15 ± 60.66     | 68.71 ± 39.37    |
| Processed meat               | 65.52 ± 50.87    | 71.19 ± 75.42     | 61.87 ± 55.3     |
| White meat                   | 45.76 ± 35.42    | 54.93 ± 37.68     | 44.68 ± 19.31    |

Values are shown as mean ± standard deviation (SD) and number of volunteers with available information in parentheses. (\*) Statistically significant differences compared to control group ( $p < 0.05$ ). Differences were analyzed by non-parametric tests. CRC, colorectal cancer.

**Table S3.** Food groups consumption according to aberrant crypt foci (ACF) presence in intestinal mucosa of volunteers diagnosed with intestinal polyps.

| Food group (g/day)           | ACF presence        |                     |
|------------------------------|---------------------|---------------------|
|                              | No ( <i>n</i> = 34) | Yes ( <i>n</i> = 8) |
| Oils and fats                | 23.68 ± 15.01       | 30.8 ± 18           |
| Cereals and cereals products | 186.65 ± 101.32     | 165.97 ± 69.58      |
| Whole grain cereals          | 9.69 ± 26.94        | 6.23 ± 16.2         |
| Milk and dairy products      | 392.49 ± 230.51     | 380.48 ± 271.04     |
| Meat and meat products       | 171.12 ± 90.45      | 218.82 ± 133.09     |
| Eggs                         | 44.9 ± 22.64        | 46.34 ± 29.63       |
| Fish                         | 56.46 ± 34.19       | 45.6 ± 27.33        |
| Seafood                      | 14.33 ± 14          | 34.01 ± 23.94 *     |
| Vegetables                   | 261.26 ± 189.27     | 257.89 ± 104.16     |
| Legumes                      | 28.45 ± 21.13       | 34.04 ± 25.59       |
| Potatoes and tubers          | 66.5 ± 45.71        | 78.17 ± 62.07       |
| Fruits                       | 154.68 ± 152.66     | 120.58 ± 164.17     |
| Nuts and seeds               | 10.26 ± 11.2        | 9.56 ± 13.33        |
| Sugar and sweets             | 15.94 ± 15.6        | 14.3 ± 10.88        |
| Sauces and condiments        | 10.66 ± 7.66        | 13.33 ± 14.57       |
| Other foods                  | 21.47 ± 52          | 18.08 ± 24.4        |
| Non-alcoholic beverages      | 1738.15 ± 859.69    | 1615.58 ± 527.71    |
| Alcoholic beverages          | 375.15 ± 663.8      | 268.72 ± 219.55     |
| Red meat                     | 66.78 ± 57.87       | 79.14 ± 46.3        |
| Processed meat               | 56.16 ± 44.53       | 85.39 ± 89.79       |
| White meat                   | 52.81 ± 36.12       | 63.43 ± 48.94       |

Values are shown as mean ± standard deviation (SD) and number of volunteers with available information in parentheses. (\*) Statistically significant differences between groups ( $p < 0.05$ ). Differences were analyzed by non-parametric tests. ACF, aberrant crypt foci.

**Table S4.** Dietary compounds intake according to clinical diagnosis groups.

| Compounds                           | Control ( <i>n</i> = 37) | Polyps ( <i>n</i> = 49) | CRC ( <i>n</i> = 3) |
|-------------------------------------|--------------------------|-------------------------|---------------------|
| Total protein (g/day)               | 104.73 ± 36.84           | 106.74 ± 35.65          | 115.9 ± 26.42       |
| Animal protein (g/day)              | 74.63 ± 32.12            | 76.98 ± 31.61           | 84.6 ± 21.51        |
| Vegetal protein (g/day)             | 28.24 ± 11.68            | 27.87 ± 10.95           | 28.01 ± 10.35       |
| Total lipids (g/day)                | 92.1 ± 36.24             | 97.25 ± 44.31           | 102.09 ± 27.73      |
| Saturated fatty acids (g/day)       | 29.95 ± 14.54            | 31.49 ± 15.48           | 36.46 ± 11.04       |
| Monounsaturated fatty acids (g/day) | 39.47 ± 15.35            | 41.78 ± 19.47           | 42.01 ± 14.5        |
| Polyunsaturated fatty acids (g/day) | 15.48 ± 6.66             | 16.2 ± 8.98             | 15.66 ± 5.35        |
| Total carbohydrates (g/day)         | 196.01 ± 91.23           | 197.54 ± 67.96          | 219.28 ± 72.88      |
| Total dietary fiber (g/day)         | 22.7 ± 9.36              | 20.77 ± 7.77            | 22.71 ± 7.74        |
| Insoluble fiber (g/day)             | 13.82 ± 7.19             | 12.49 ± 5.19            | 13.57 ± 5.38        |
| Soluble fiber (g/day)               | 2.79 ± 1.43              | 2.5 ± 1.04              | 2.69 ± 0.85         |
| Hemicellulose (I) (g/day)           | 4.63 ± 3.19              | 3.9 ± 1.81              | 4.52 ± 2.18         |
| Hemicellulose (S) (g/day)           | 1.87 ± 1.11              | 1.72 ± 0.78             | 1.79 ± 0.74         |
| Cellulose (I) (g/day)               | 5.47 ± 2.68              | 5.12 ± 2.06             | 5.43 ± 2.15         |
| Pectin (I) (g/day)                  | 1.63 ± 0.78              | 1.48 ± 0.78             | 1.63 ± 0.46         |
| Pectin (S) (g/day)                  | 0.86 ± 0.57              | 0.72 ± 0.42             | 0.83 ± 0.33         |
| Klason lignin (g/day)               | 1.95 ± 1.18              | 1.83 ± 0.9              | 1.84 ± 0.96         |
| Vitamin A (µg R.E/day)              | 799.69 ± 398.26          | 777.12 ± 342.67         | 1088.42 ± 414.49 +  |
| Vitamin B1 (mg/day)                 | 1.82 ± 0.66              | 1.79 ± 0.88             | 1.79 ± 0.68         |
| Vitamin B12 (µg/day)                | 7.98 ± 3.83              | 8.64 ± 3.38             | 10.35 ± 1.99        |
| Vitamin B2 (mg/day)                 | 1.85 ± 0.68              | 1.91 ± 0.64             | 2.06 ± 0.35         |
| Vitamin B6 (mg/day)                 | 2.43 ± 0.77              | 2.37 ± 0.76             | 2.43 ± 0.49         |
| Vitamin C (mg/day)                  | 153.1 ± 78.76            | 158.53 ± 98.62          | 156.93 ± 57.73      |
| Vitamin D (µg/day)                  | 4.82 ± 2.92              | 5.07 ± 3.6              | 5.81 ± 3.15         |
| Vitamin E (mg E.T/day)              | 11.6 ± 5.06              | 12.14 ± 6.71            | 11.96 ± 3.79        |
| Folic acid (µg/day)                 | 338.89 ± 118.29          | 343.43 ± 135.02         | 354.06 ± 98.88      |
| Calcium (mg/day)                    | 997.3 ± 451.74           | 965.26 ± 347.48         | 1209.98 ± 214.49 +  |
| Zinc (mg/day)                       | 11.65 ± 4.61             | 11.47 ± 3.67            | 12.52 ± 2.94        |
| Phosphorus (mg/day)                 | 1565.99 ± 560.66         | 1568.49 ± 455.02        | 1758.32 ± 240.64    |
| Iron (mg/day)                       | 15.19 ± 4.95             | 16.38 ± 6.17            | 15.87 ± 3.29        |
| Magnesium (mg/day)                  | 335.35 ± 109.79          | 333.13 ± 100.75         | 355.89 ± 55.55      |
| Potassium (mg/day)                  | 3598.93 ± 1019.16        | 3709.59 ± 1122.11       | 3891.69 ± 641.04    |
| Selenium (µg/day)                   | 4.1 ± 5.92               | 3.79 ± 8.08             | 8.72 ± 15.75        |
| Sodium (mg/day)                     | 3334.65 ± 1404.68        | 3393.44 ± 1685.51       | 3623.42 ± 1619.36   |
| Total polyphenols (mg/day)          | 1578.42 ± 777.42         | 1615.74 ± 1015.52       | 1682.65 ± 885.68    |
| Flavonoids (mg/day)                 | 175.21 ± 120.2           | 286.85 ± 345.35         | 260.19 ± 219.78     |
| Lignans (mg/day)                    | 63.79 ± 46.72            | 58.12 ± 70.45           | 62.99 ± 31.56       |
| Other polyphenols (mg/day)          | 39.27 ± 43.4             | 33.22 ± 38.42           | 40.85 ± 36.41       |
| Phenolic acids (mg/day)             | 610.82 ± 425.24          | 499.23 ± 412            | 634.2 ± 464.98      |
| Stilbenes (mg/day)                  | 0.9 ± 2.43               | 3.03 ± 6.85             | 1.91 ± 3.76         |
| ORAC total                          | 5394.79 ± 3520.51        | 7063.27 ± 7951.55       | 5862.57 ± 3487.33   |
| ORAC hydrophilic                    | 5246.67 ± 3475.62        | 6945.9 ± 7928.78        | 5774.74 ± 3509.21   |
| ORAC lipophilic                     | 155.93 ± 122.86          | 124.53 ± 100.24         | 92.44 ± 50.44       |
| Ethanol (g/day)                     | 7.08 ± 10.48             | 18.72 ± 26.11 *         | 10.11 ± 11.15       |
| Total PAH (µg/day)                  | 1.08 ± 0.64              | 1.16 ± 0.49             | 1.24 ± 0.41         |
| B(a)P (µg/day)                      | 0.06 ± 0.03              | 0.07 ± 0.03             | 0.06 ± 0.03         |
| DiB(a)A (µg/day)                    | 0.09 ± 0.18              | 0.16 ± 0.28 *           | 0.15 ± 0.24         |
| Total HAs (ng/day)                  | 269.62 ± 441.18          | 559.94 ± 1568.05        | 175.42 ± 102.72     |
| PhIP (ng/day)                       | 199.39 ± 318.42          | 438.41 ± 1253.78        | 117.5 ± 93.43       |
| DiMeIQx (ng/day)                    | 18.28 ± 40.36            | 36.6 ± 119.83           | 15.28 ± 16.58       |

| Compounds           | Control ( <i>n</i> = 37) | Polyps ( <i>n</i> = 49) | CRC ( <i>n</i> = 3) |
|---------------------|--------------------------|-------------------------|---------------------|
| MelQx (ng/day)      | 50.35 ± 95.57            | 83.58 ± 209.91          | 41.65 ± 33.52       |
| MelQ (ng/day)       | 1.43 ± 1.66              | 0.9 ± 1.06              | 0.83 ± 1.12         |
| Nitrates (mg/day)   | 121.89 ± 103.85          | 105.13 ± 81.44          | 111.66 ± 72.04      |
| Nitrites (mg/day)   | 3.3 ± 2.56               | 4.65 ± 10.77            | 3.3 ± 3.04          |
| NDMA (µg/day)       | 0.2 ± 0.14               | 0.23 ± 0.22             | 0.22 ± 0.12         |
| NPIP (µg/day)       | 0.1 ± 0.08               | 0.09 ± 0.1              | 0.09 ± 0.09         |
| NPYR (µg/day)       | 0.16 ± 0.14              | 0.14 ± 0.16             | 0.14 ± 0.14         |
| Acrylamide (µg/day) | 16.23 ± 11.44            | 16.54 ± 10.94           | 22.81 ± 15.44       |

Values are shown as mean ± standard deviation (SD) and number of volunteers with available information in parentheses. (\*) Statistically significant differences compared to control group ( $p < 0.05$ ). (\*) Statistically significant differences compared to polyps group ( $p < 0.05$ ). Differences were analyzed by non-parametric tests. CRC, colorectal cancer. I, insoluble; S, soluble; ORAC, oxygen radical absorbance capacity; Total PAHs, total polycyclic aromatic hydrocarbons; B(a)P, benzo (a) pyrene; DiB(a)A, dibenzo (a) anthracene; Total HA, total heterocyclic amines; PhIP, 2-amino-1-methyl-6-phenylimidazo (4,5,b) pyridine; DiMeIQx, 2-amino-3,4,8 trimethylimidazo (4,5,f) quinoxaline; MeIQx, 2-amino-3,8 dimethylimidazo (4,5,f) quinoxaline; MeIQ, 2-amino-3,4 dimethylimidazo (4,5,f) quinoxaline; NDMA, N-nitrosodimethylamine; NPIP, N-nitrosopiperidine; NPYR, N-nitrosopyrrolidine.

**Table S5.** Dietary compounds intake according to aberrant crypt foci (ACF) presence in intestinal mucosa of volunteers diagnosed with intestinal polyps.

| Compounds                           | ACF presence        |                     |
|-------------------------------------|---------------------|---------------------|
|                                     | No ( <i>n</i> = 34) | Yes ( <i>n</i> = 8) |
| Total protein (g/day)               | 102.61 ± 30.5       | 109.61 ± 42.58      |
| Animal protein (g/day)              | 72.7 ± 24.49        | 79.89 ± 40.28       |
| Vegetal protein (g/day)             | 28.11 ± 11.71       | 27.5 ± 11.48        |
| Total lipids (g/day)                | 91.97 ± 37.36       | 100.23 ± 43.22      |
| Saturated fatty acids (g/day)       | 30.03 ± 13.05       | 29.67 ± 15.08       |
| Monounsaturated fatty acids (g/day) | 39.27 ± 16.94       | 47.07 ± 21.59       |
| Polyunsaturated fatty acids (g/day) | 15.2 ± 7.53         | 15.5 ± 6.61         |
| Total carbohydrates (g/day)         | 198.33 ± 73.09      | 194.07 ± 50.95      |
| Total dietary fiber (g/day)         | 21.5 ± 8.25         | 19.96 ± 8.49        |
| Insoluble fiber (g/day)             | 12.93 ± 5.53        | 11.5 ± 5.17         |
| Soluble fiber (g/day)               | 2.62 ± 1.12         | 2.23 ± 0.97         |
| Hemicelulose (I) (g/day)            | 4.03 ± 1.94         | 3.48 ± 1.64         |
| Hemicelulose (S) (g/day)            | 1.78 ± 0.82         | 1.53 ± 0.76         |
| Cellulose (I) (g/day)               | 5.27 ± 2.1          | 4.86 ± 2.33         |
| Pectin (I) (g/day)                  | 1.57 ± 0.86         | 1.35 ± 0.63         |
| Pectin (S) (g/day)                  | 0.79 ± 0.46         | 0.6 ± 0.3           |
| Klason lignin (g/day)               | 1.89 ± 0.97         | 1.69 ± 0.67         |
| Vitamin A (µg R.E/day)              | 808.64 ± 358.28     | 629.3 ± 240.55      |
| Vitamin B1 (mg/day)                 | 1.68 ± 0.59         | 1.87 ± 0.93         |
| Vitamin B12 (µg/day)                | 8.26 ± 3.26         | 9.74 ± 4.51         |
| Vitamin B2 (mg/day)                 | 1.91 ± 0.58         | 1.9 ± 0.84          |
| Vitamin B6 (mg/day)                 | 2.32 ± 0.65         | 2.43 ± 1.04         |
| Vitamin C (mg/day)                  | 164.71 ± 104.99     | 153.41 ± 110.94     |
| Vitamin D (µg/day)                  | 4.98 ± 3.55         | 3.61 ± 2.14         |
| Vitamin E (mg E.T/day)              | 11.52 ± 5.2         | 11.25 ± 4.29        |
| Folic acid (µg/day)                 | 354.25 ± 144.24     | 334 ± 144.09        |
| Calcium (mg/day)                    | 1003.22 ± 350.52    | 889.54 ± 380.46     |
| Zinc (mg/day)                       | 11.2 ± 3.22         | 12.11 ± 5.12        |
| Phosphorus (mg/day)                 | 1549.18 ± 426.31    | 1563.66 ± 528.49    |
| Iron (mg/day)                       | 15.98 ± 6.36        | 17.63 ± 6.42        |
| Magnesium (mg/day)                  | 334.62 ± 107.54     | 333.66 ± 94.47      |
| Potassium (mg/day)                  | 3704.77 ± 1183.21   | 3832.88 ± 1075.26   |
| Selenium (µg/day)                   | 3.97 ± 9.37         | 3.86 ± 4.77         |
| Sodium (mg/day)                     | 3119.58 ± 1363.89   | 3648.36 ± 2233.26   |
| Total polyphenols (mg/day)          | 1646.85 ± 1114.45   | 1477.53 ± 878.06    |
| Flavonoids (mg/day)                 | 306.34 ± 361.08     | 258.43 ± 324.63     |
| Lignans (mg/day)                    | 63.32 ± 82.27       | 46.57 ± 38.3        |
| Other polyphenols (mg/day)          | 37.1 ± 44.43        | 23.2 ± 12.21        |
| Phenolic acids (mg/day)             | 489 ± 379.15        | 391.23 ± 379.95     |
| Stilbenes (mg/day)                  | 3.3 ± 7.75          | 2.76 ± 3.95         |
| ORAC total                          | 7560.47 ± 9068.59   | 6881.95 ± 4560.86   |
| ORAC hydrophilic                    | 7433.18 ± 9041.56   | 6757.92 ± 4559.61   |
| ORAC lipophilic                     | 134.19 ± 104.58     | 130.39 ± 115.42     |
| Ethanol (g/day)                     | 18.42 ± 28.41       | 14.81 ± 10.86       |
| Total PAH (µg/day)                  | 1.17 ± 0.53         | 1.12 ± 0.39         |
| B(a)P (µg/day)                      | 0.07 ± 0.02         | 0.05 ± 0.02         |
| DiB(a)A (µg/day)                    | 0.18 ± 0.31         | 0.07 ± 0.09         |
| Total HAs (ng/day)                  | 594.48 ± 1840.22    | 540.1 ± 864.75      |

| Compounds           | ACF presence     |                |
|---------------------|------------------|----------------|
|                     | No (n = 34)      | Yes (n = 8)    |
| PhIP (ng/day)       | 456.46 ± 1461.76 | 467.7 ± 785.14 |
| DiMeIQx (ng/day)    | 43.92 ± 143.38   | 18.71 ± 23.75  |
| MeIQx (ng/day)      | 92.56 ± 248.2    | 52.66 ± 60.21  |
| MeIQ (ng/day)       | 0.98 ± 1.15      | 0.83 ± 0.89    |
| Nitrates (mg/day)   | 109.05 ± 83.62   | 126.77 ± 98.05 |
| Nitrites (mg/day)   | 4.7 ± 12.67      | 3.44 ± 3.07    |
| NDMA (µg/day)       | 0.21 ± 0.17      | 0.23 ± 0.24    |
| NPIP (µg/day)       | 0.07 ± 0.06      | 0.1 ± 0.1      |
| NPYR (µg/day)       | 0.11 ± 0.08      | 0.16 ± 0.15    |
| Acrylamide (µg/day) | 16.85 ± 11.35    | 20.01 ± 12.33  |

Values are shown as mean ± standard deviation (SD) and number of volunteers with available information in parentheses. No statistical significant differences were found between groups. Differences were analyzed by non-parametric tests. ACF, aberrant crypt foci. I, insoluble; S, soluble; ORAC, oxygen radical absorbance capacity; Total PAHs, total polycyclic aromatic hydrocarbons; B(a)P, benzo (a) pyrene; DiB(a)A, dibenzo (a) anthracene; Total HA, total heterocyclic amines; PhIP, 2-amino-1-methyl-6-phenylimidazo (4,5,b) pyridine; DiMeIQx, 2-amino-3,4,8 trimethylimidazo (4,5,f) quinoxaline; MeIQx, 2-amino-3,8 dimethylimidazo (4,5,f) quinoxaline; MeIQ, 2-amino-3,4 dimethylimidazo (4,5,f) quinoline; NDMA, N-nitrosodimethylamine; NPIP, N-nitrosopiperidine; NPYR, N-nitrosopyrrolidine.

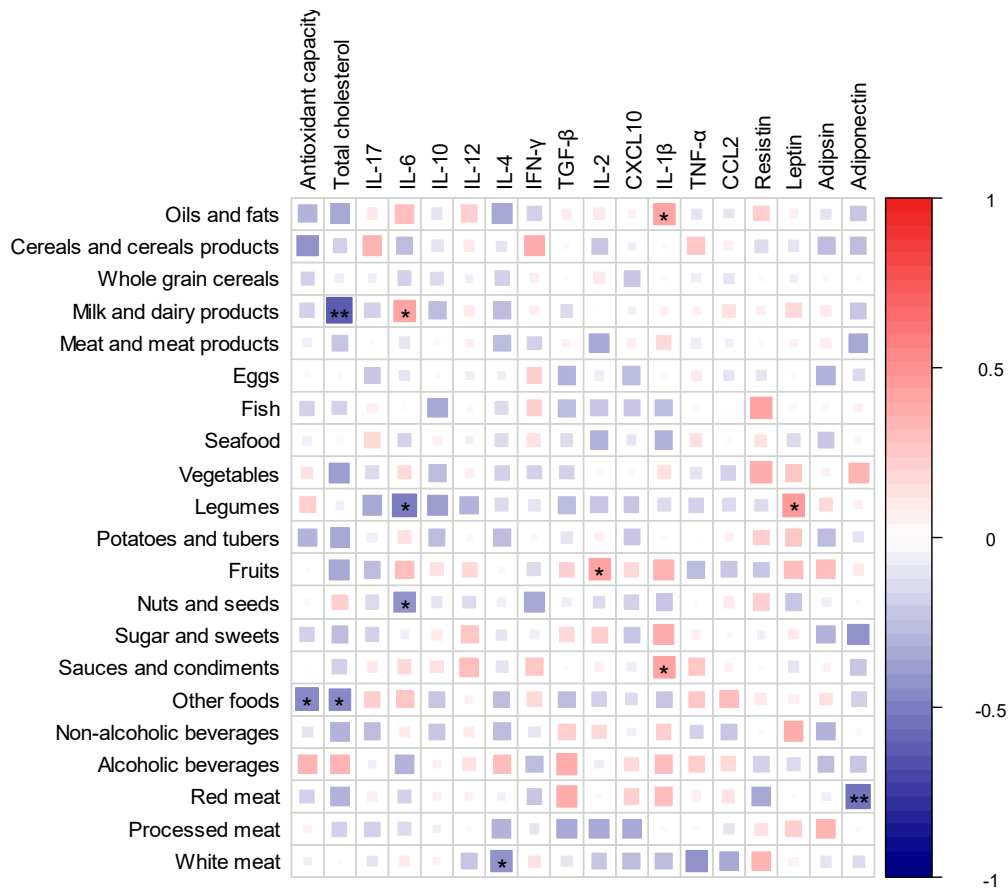

**Figure S1.** Heatmap defined by Spearman correlations between immunological parameters and food groups in the group of control volunteers. Blue and red colors represent negative and positive associations, respectively. The colour intensity is proportional to the degree of association. (\*)  $p < 0.05$  (\*\*)  $p < 0.001$ . IL, interleukin; IFN- $\gamma$ , interferon-gamma; TGF- $\beta$ , transforming growth factor-beta; CXCL10, C-X-C motif chemokine ligand 10; TNF- $\alpha$ , tumour necrosis factor-alpha; CCL2, chemokine (C-C motif) ligand 2.



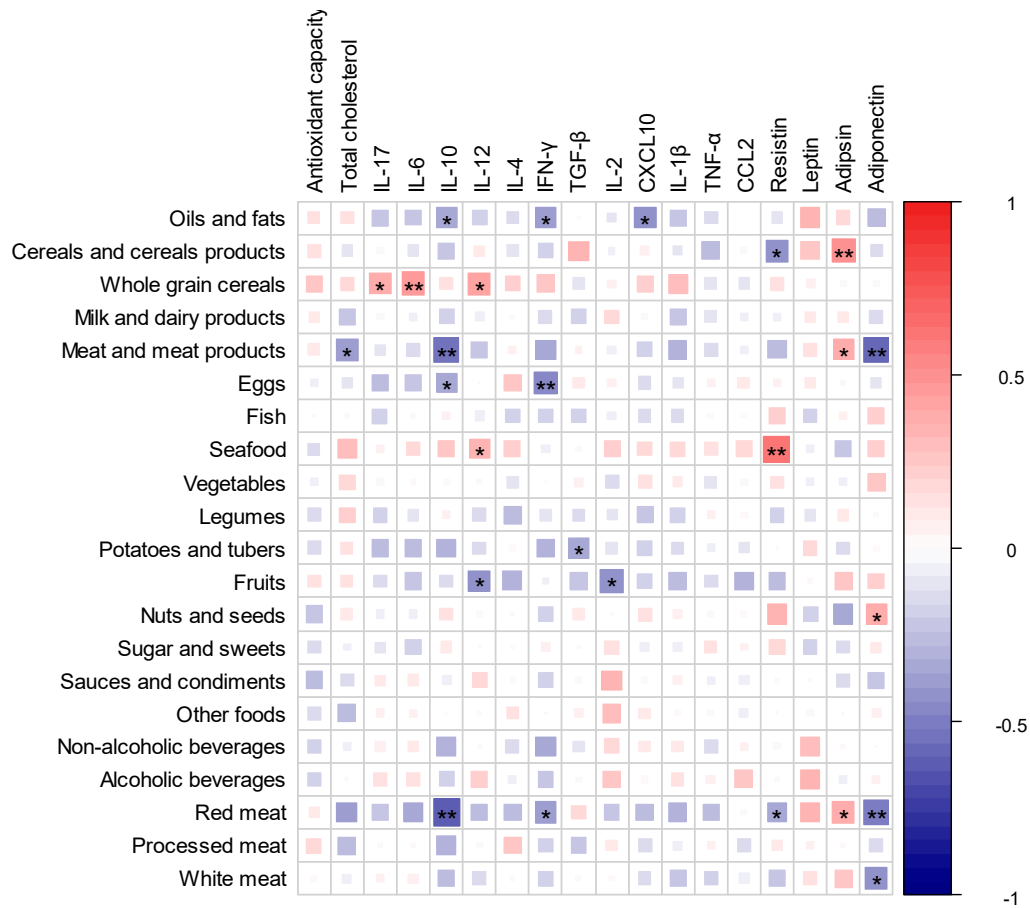

**Figure S2.** Heatmap defined by Spearman correlations between immunological parameters and food groups in the group of volunteers diagnosed with intestinal polyps. Blue and red colors represent negative and positive associations, respectively. The colour intensity is proportional to the degree of association. (\*)  $p < 0.05$  (\*\*)  $p < 0.001$ . IL, interleukin; IFN- $\gamma$ , interferon-gamma; TGF- $\beta$ , transforming growth factor-beta; CXCL10, C-X-C motif chemokine ligand 10; TNF- $\alpha$ , tumour necrosis factor-alpha; CCL2, chemokine (C-C motif) ligand 2.

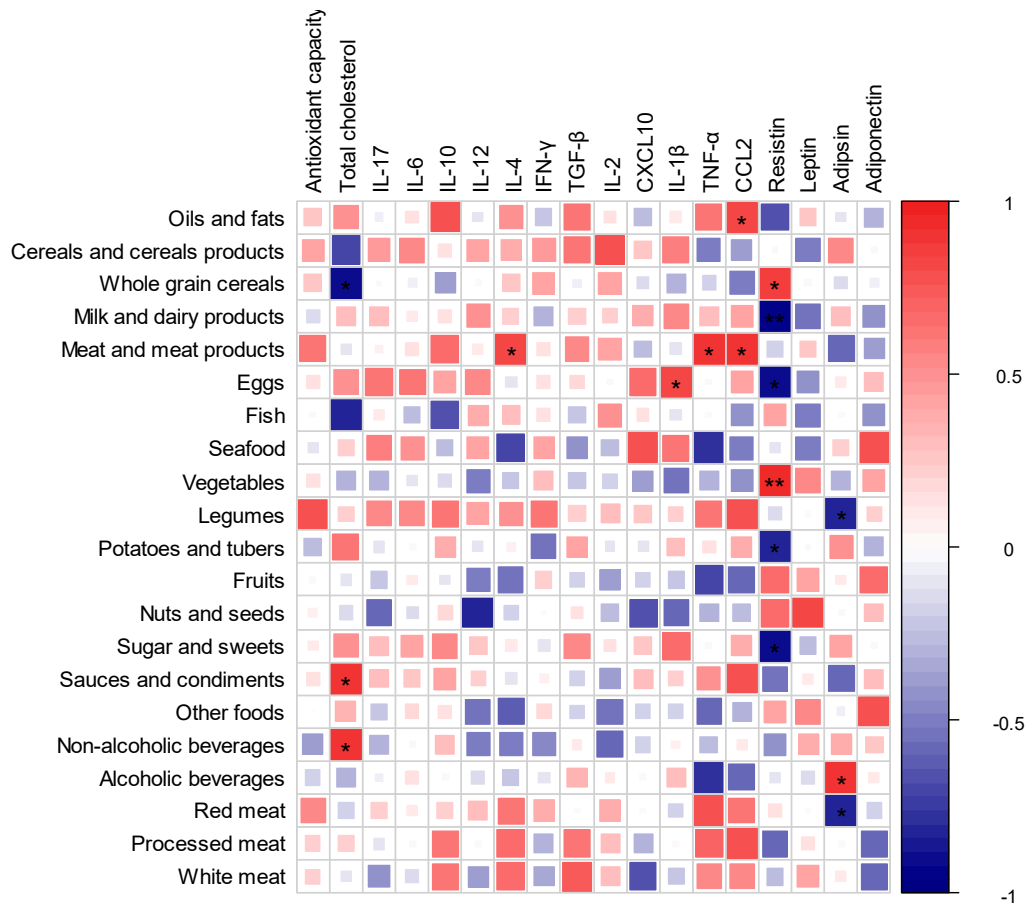

**Figure S3.** Heatmap defined by Spearman correlations between immunological parameters and food groups in the group of volunteers diagnosed with CRC. Blue and red colors represent negative and positive associations, respectively. The colour intensity is proportional to the degree of association. (\*)  $p < 0.05$  (\*\*)  $p < 0.001$ . IL, interleukin; IFN- $\gamma$ , interferon-gamma; TGF- $\beta$ , transforming growth factor-beta; CXCL10, C-X-C motif chemokine ligand 10; TNF- $\alpha$ , tumour necrosis factor-alpha; CCL2, chemokine (C-C motif) ligand 2.

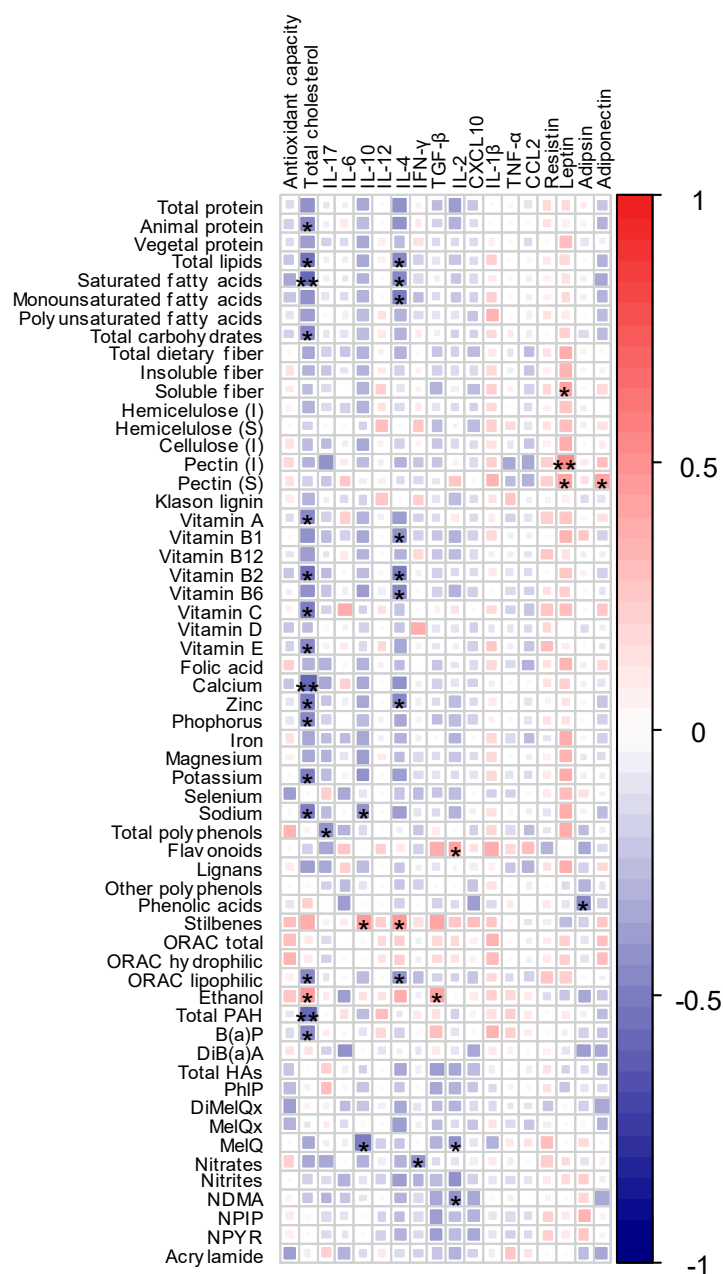

**Figure S4.** Heatmap defined by Spearman correlations between immunological parameters and dietary compounds in the group of control volunteers. Blue and red colors represent negative and positive associations, respectively. The colour intensity is proportional to the degree of association. (\*)  $p < 0.05$  (\*\*)  $p < 0.001$ . IL, interleukin; IFN- $\gamma$ , interferon-gamma; TGF- $\beta$ , transforming growth factor-beta; CXCL10, C-X-C motif chemokine ligand 10; TNF- $\alpha$ , tumour necrosis factor-alpha; CCL2, chemokine (C-C motif) ligand 2; I, insoluble; S, soluble; ORAC, oxygen radical absorbance capacity; Total PAHs, total polycyclic aromatic hydrocarbons; B(a)P, benzo (a) pyrene; DiB(a)A, dibenzo (a) anthracene; Total HA, total heterocyclic amines; PhIP, 2-amino-1-methyl-6-phenylimidazo (4,5,b) pyridine; DiMeIQx, 2-amino-3,4,8 trimethylimidazo (4,5,f) quinoxaline; MeIQx, 2-amino-3,8 dimethylimidazo (4,5,f) quinoxaline; MeIQ, 2-amino-3,4 dimethylimidazo (4,5,f) quinoline; NDMA, N-nitrosodimethylamine; NPIP, N-nitrosopiperidine; NPYR, N-nitrosopyrrolidine.

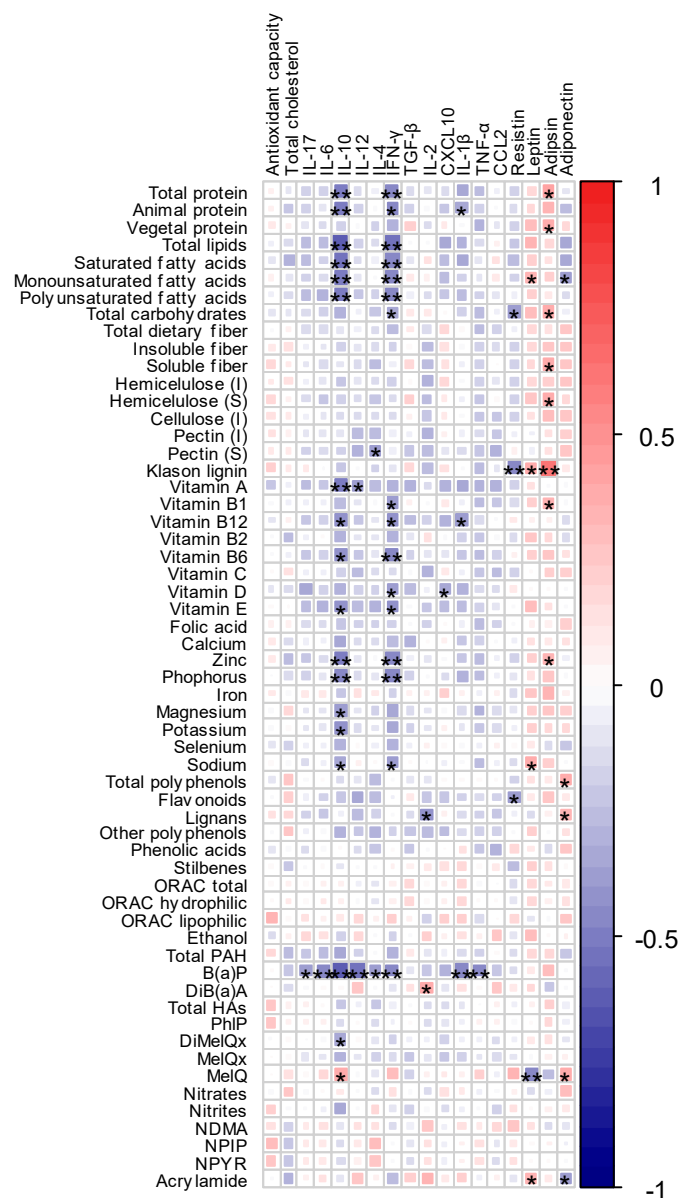

**Figure S5.** Heatmap defined by Spearman correlations between immunological parameters and dietary compounds in the group of volunteers diagnosed with intestinal polyps. Blue and red colors represent negative and positive associations, respectively. The colour intensity is proportional to the degree of association. (\*)  $p < 0.05$  (\*\*)  $p < 0.001$ . IL, interleukin; IFN- $\gamma$ , interferon-gamma; TGF- $\beta$ , transforming growth factor-beta; CXCL10, C-X-C motif chemokine ligand 10; TNF- $\alpha$ , tumour necrosis factor-alpha; CCL2, chemokine (C-C motif) ligand 2; I, insoluble; S, soluble; ORAC, oxygen radical absorbance capacity; Total PAHs, total polycyclic aromatic hydrocarbons; B(a)P, benzo (a) pyrene; DiB(a)A, dibenzo (a) anthracene; Total HA, total heterocyclic amines; PhIP, 2-amino-1-methyl-6-phenylimidazo (4,5,b) pyridine; DiMeIQx, 2-amino-3,4,8 trimethylimidazo (4,5,f) quinoxaline; MeIQx, 2-amino-3,8 dimethylimidazo (4,5,f) quinoxaline; MeIQ, 2-amino-3,4 dimethylimidazo (4,5,f) quinoline; NDMA, N-nitrosodimethylamine; NPIP, N-nitrosopiperidine; NPYR, N-nitrosopyrrolidine.

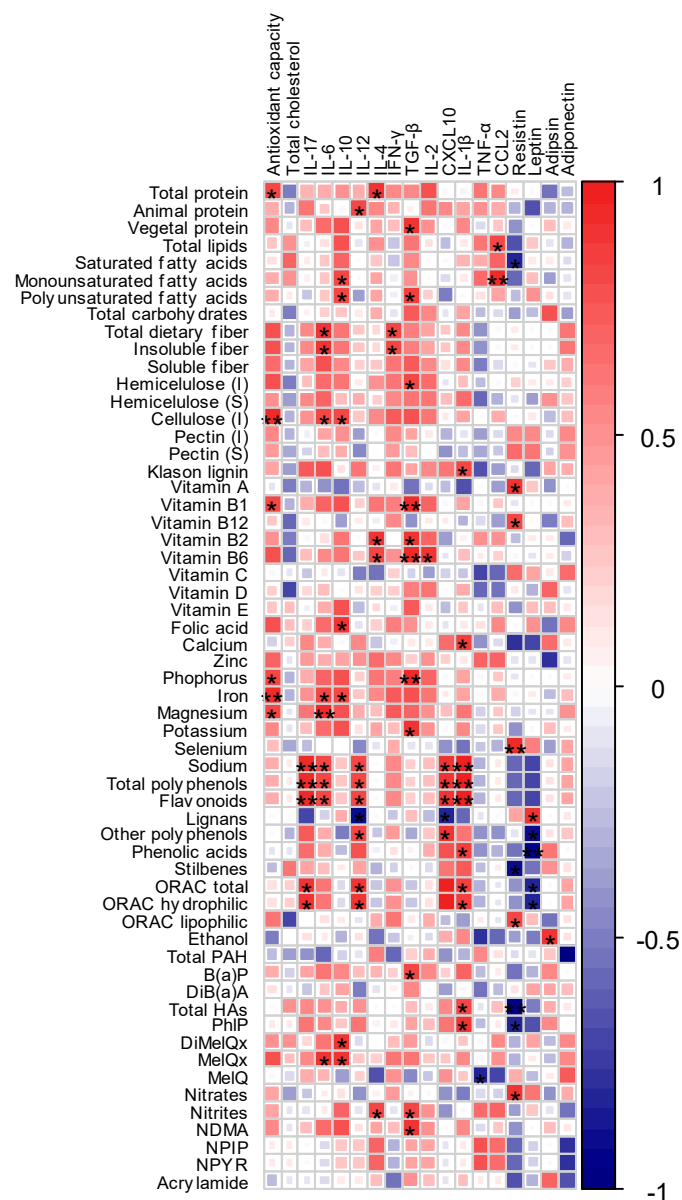

**Figure S6.** Heatmap defined by Spearman correlations between immunological parameters and dietary compounds in the group of volunteers diagnosed with CRC. Blue and red colors represent negative and positive associations, respectively. The colour intensity is proportional to the degree of association. (\*)  $p < 0.05$  (\*\*)  $p < 0.001$ . IL, interleukin; IFN- $\gamma$ , interferon-gamma; TGF- $\beta$ , transforming growth factor-beta; CXCL10, C-X-C motif chemokine ligand 10; TNF- $\alpha$ , tumour necrosis factor-alpha; CCL2, chemokine (C-C motif) ligand 2; I, insoluble; S, soluble; ORAC, oxygen radical absorbance capacity; Total PAHs, total polycyclic aromatic hydrocarbons; B(a)P, benzo (a) pyrene; DiB(a)A, dibenzo (a) anthracene; Total HA, total heterocyclic amines; PhIP, 2-amino-1-methyl-6-phenylimidazo (4,5,b) pyridine; DiMeIQx, 2-amino-3,4,8 trimethylimidazo (4,5,f) quinoxaline; MeIQx, 2-amino-3,8 dimethylimidazo (4,5,f) quinoxaline; MeIQ, 2-amino-3,4 dimethylimidazo (4,5,f) quinoxaline; NDMA, N-nitrosodimethylamine; NPIP, N-nitrosopiperidine; NPYR, N-nitrosopyrrolidine.
